# Supplementary material
Source: PubMed Central journal article supplement (PMC8041322)
Supplement: awaa413_supplementary_data.pdf [file awaa413_supplementary_data.pdf]

## Supplemental Material

**Supplemental Table 1.** Psychosis subtype by individual pathology groups

|                                          | AD<br>(111) | LBD/AD<br>(59) | PSP<br>(63) | Pick's<br>(26) | CBD<br>(44) | TDP-<br>A (17) | TDP-<br>B<br>(33) | TDP-<br>C<br>(19) |
|------------------------------------------|-------------|----------------|-------------|----------------|-------------|----------------|-------------------|-------------------|
| Psychosis %                              | 22.5        | 55.9           | 22.2        | 23.1           | 9.1         | 52.9           | 42.4              | 31.6              |
| Delusions %                              | 16.2        | 25.9           | 12.7        | 15.4           | 2.3         | 35.3           | 36.4              | 31.6              |
| Hallucination %                          | 13.5        | 48.3           | 22.2        | 11.5           | 9.1         | 23.5           | 30.3              | 5.3               |
| Both del and hal                         | 7.2         | 25.9           | 14.3        | 3.8            | 2.3         | 5.9            | 24.2              | 5.3               |
| Delusion 1 <sup>st</sup> Sx              | 0           | 3.4            | 0           | 3.8            | 0           | 5.9            | 12.1              | 0                 |
| Delusion first 3<br>years                | 1.8         | 10.2           | 4.8         | 7.7            | 2.3         | 23.5           | 18.2              | 0                 |
| >1 subtype del                           | 6.8         | 20             | 5.3         | 0              | 0           | 21.4           | 25.8              | 5.3               |
| Hallucination 1 <sup>st</sup> Sx         | 0.9         | 3.4            | 0           | 0              | 0           | 0              | 9.1               | 0                 |
| Hallucination 1 <sup>st</sup> 3<br>years | 5           | 28.8           | 9.5         | 4.3            | 2.3         | 33.3           | 20.7              | 0                 |
| >1 Hallucination                         | 10          | 35.2           | 6.3         | 0              | 9.1         | 8.3            | 13.8              | 0                 |
| Hallucination subtypes                   |             |                |             |                |             |                |                   |                   |
| Shape                                    | 3.7         | 12.5           | 0           | 3.8            | 2.3         | 0              | 3                 | 0                 |
| Corner of Eye                            | 1.8         | 17.5           | 0           | 0              | 4.5         | 0              | 3                 | 0                 |
| Moves                                    | 2.8         | 14.3           | 0           | 3.8            | 2.3         | 0              | 0                 | 0                 |
| Animal                                   | 3.7         | 16.1           | 4.8         | 0              | 6.8         | 11.8           | 9.1               | 5.3               |
| Insect                                   | 5.6         | 7.3            | 1.6         | 0              | 0           | 0              | 3                 | 0                 |
| Object                                   | 2.8         | 10.7           | 0           | 0              | 0           | 0              | 0                 | 0                 |
| Perception                               | 3.7         | 19.6           | 3.2         | 0              | 4.5         | 11.8           | 9.1               | 0                 |
| Person                                   | 7.3         | 32.1           | 11.3        | 0              | 4.5         | 6.3            | 9.7               | 0                 |
| Sound                                    | 1.8         | 3.5            | 4.8         | 4              | 0           | 0              | 3                 | 0                 |
| Voice                                    | 1.8         | 3.6            | 1.6         | 0              | 2.3         | 5.9            | 3                 | 0                 |
| Smell                                    | 0           | 1.8            | 0           | 4              | 0           | 0              | 0                 | 0                 |

|                              |      |      |      |      |     |      |      |      |
|------------------------------|------|------|------|------|-----|------|------|------|
| Taste                        | 0    | 0    | 0    | 0    | 0   | 0    | 0    | 0    |
| Touch                        | 0    | 3.5  | 0    | 0    | 0   | 0    | 3    | 0    |
| Delusion subtypes            |      |      |      |      |     |      |      |      |
| Non Bizarre                  | 12.7 | 29.3 | 14.3 | 15.4 | 2.3 | 35.3 | 37.5 | 31.6 |
| Bizarre                      | 3.6  | 6.9  | 1.6  | 0    | 0   | 5.9  | 9.4  | 5.3  |
| Paranoid non<br>bizarre      | 9.1  | 19   | 9.5  | 15.4 | 2.3 | 29.4 | 28.1 | 21.1 |
| Paranoid bizarre             | 0.9  | 1.7  | 0    | 0    | 0   | 0    | 3.1  | 0    |
| Ideas of reference           | 1.8  | 1.7  | 0    | 0    | 0   | 0    | 3    | 0    |
| Erotomania                   | 0    | 0    | 0    | 0    | 0   | 5.9  | 6.1  | 5.3  |
| Misidentification            | 4.5  | 13.8 | 0    | 0    | 0   | 17.6 | 6.1  | 0    |
| Capgras                      | 0    | 1.7  | 0    | 0    | 0   | 0    | 3.1  | 0    |
| Fregoli                      | 0    | 0    | 0    | 0    | 0   | 0    | 0    | 0    |
| Intermetamorphosis           | 0    | 0    | 0    | 0    | 0   | 0    | 0    | 0    |
| Hyperfamiliarity             | 0.9  | 0    | 0    | 0    | 0   | 0    | 0    | 0    |
| Object                       | 0    | 1.7  | 0    | 0    | 0   | 0    | 0    | 0    |
| Place                        | 2.7  | 10.3 | 4.8  | 0    | 0   | 0    | 0    | 0    |
| Reduplicative<br>paramnesia  | 0.9  | 3.4  | 1.6  | 0    | 0   | 0    | 0    | 0    |
| Own House                    | 1.8  | 6.9  | 3.2  | 0    | 0   | 0    | 0    | 0    |
| Misidentification of<br>limb | 0    | 0    | 1.6  | 0    | 0   | 0    | 0    | 0    |
| Feelling of<br>presence      | 0.9  | 15.5 | 3.2  | 0    | 0   | 0    | 3.1  | 0    |
| Suspicion                    | 2.7  | 5.2  | 1.6  | 11.5 | 0   | 5.9  | 6.3  | 5.3  |
| Grandiose                    | 1.8  | 0    | 0    | 0    | 0   | 0    | 9.4  | 5.3  |
| Adultery                     | 0.9  | 5.2  | 3.2  | 0    | 0   | 5.9  | 6.3  | 5.3  |
| Persecutory                  | 1.8  | 8.5  | 3.2  | 7.7  | 2.3 | 11.8 | 15.2 | 15.8 |
| Theft                        | 0    | 3.4  | 1.6  | 3.8  | 2.3 | 5.9  | 0    | 10.5 |
| Intrusion                    | 0.9  | 5.2  | 0    | 0    | 0   | 0    | 12.5 | 5.3  |

|         |     |     |     |      |   |      |      |     |
|---------|-----|-----|-----|------|---|------|------|-----|
| Hurt    | 0.9 | 5.2 | 1.6 | 3.8  | 0 | 5.9  | 6.3  | 5.3 |
| Somatic | 0   | 0   | 1.6 | 0    | 0 | 5.9  | 3.1  | 0   |
| Harmful | 4.5 | 6.8 | 4.8 | 11.5 | 0 | 17.6 | 21.2 | 5.3 |

## Appendix A

### **Neuropathological assessment**

Initial brain cutting and fixation procedures varied depending on the time and location of the evaluation. For most cases, the fresh brain was cut into 1-cm thick coronal slabs, which were alternately fixed in 10% neutral buffered formalin for 72 hours or rapidly frozen. Basic and immunohistochemical stains were applied to 8 µm thick sections cut from 25 tissue blocks dissected from the fixed slabs, covering dementia-related regions of interest and following standard diagnostic procedures (Montine *et al.*, 2012). Immunohistochemistry was performed using antibodies to: TDP-43 (1:2000, Proteintech Group, Chicago, IL, USA), hyperphosphorylated tau (CP-13 antibody, courtesy of P. Davies, NY), beta-amyloid (4G8, 1:250, Millipore, Billerica, MA, USA), alpha synuclein (1:1000, syn211, 36-008, Millipore, Billerica, MA, USA). For all antibodies, immunoperoxidase staining was performed using an avidin-biotin complex detection system (Vectastain ABC kit; Vector Laboratories, Burlingame, CA, USA) with 3,3 diaminobenzidine as the chromogen. Slides were pretreated for antigen retrieval by immersion in citrate pH 6.0 in an autoclave at 121° C for 5 min. The primary antibodies were incubated overnight at 4°C and species-specific biotinylated secondary antibodies were incubated for one hour at room temperature. All immunohistochemical runs included positive control sections to exclude technical factors as a cause of absent immunoreactivity.
